# Supplementary material
Source: MDPI journal article supplement (https://www.mdpi.com/2073-4395/14/2/296)
Supplement: s1 [file s1]

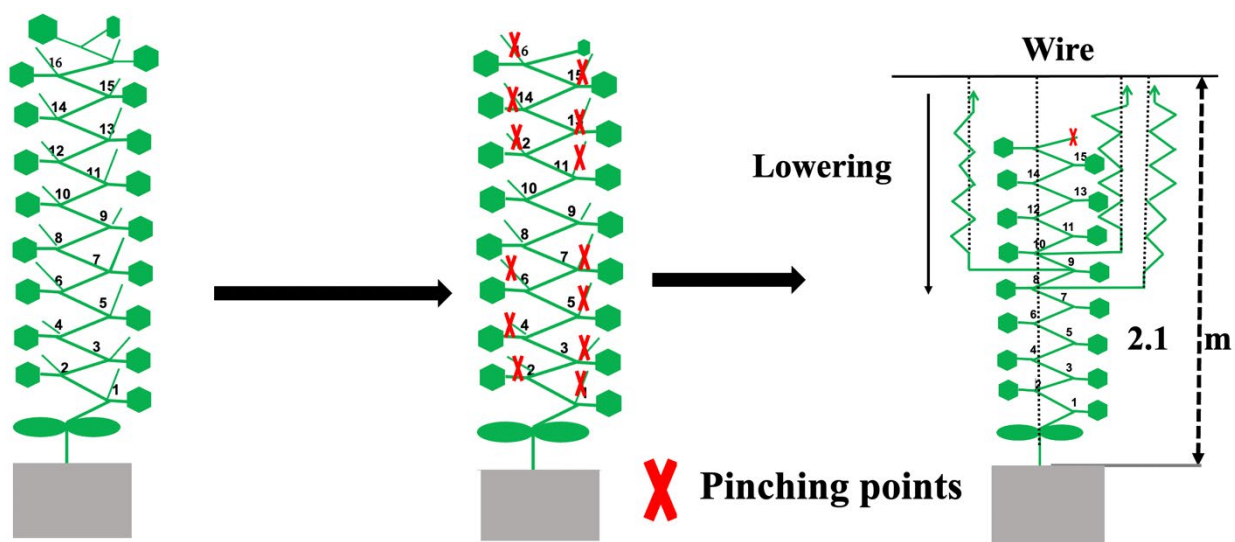

Figure S1: Lowering training method [35]

## Changes in Greenhouse internal environmental conditions

The daily cumulative solar radiation intensity in the greenhouse progressively decreased from September to January and slightly increased in February. Its daily average value in the greenhouse was  $3.6 \text{ MJ m}^{-2}$  (Fig. S2a). The daily average temperature (Fig. S2a), relative humidity, and  $\text{CO}_2$  concentration (Fig. S2 b) were  $18.7^\circ\text{C}$ ,  $74.3\%$ , and  $569.9 \mu\text{mol mol}^{-1}$ , respectively.

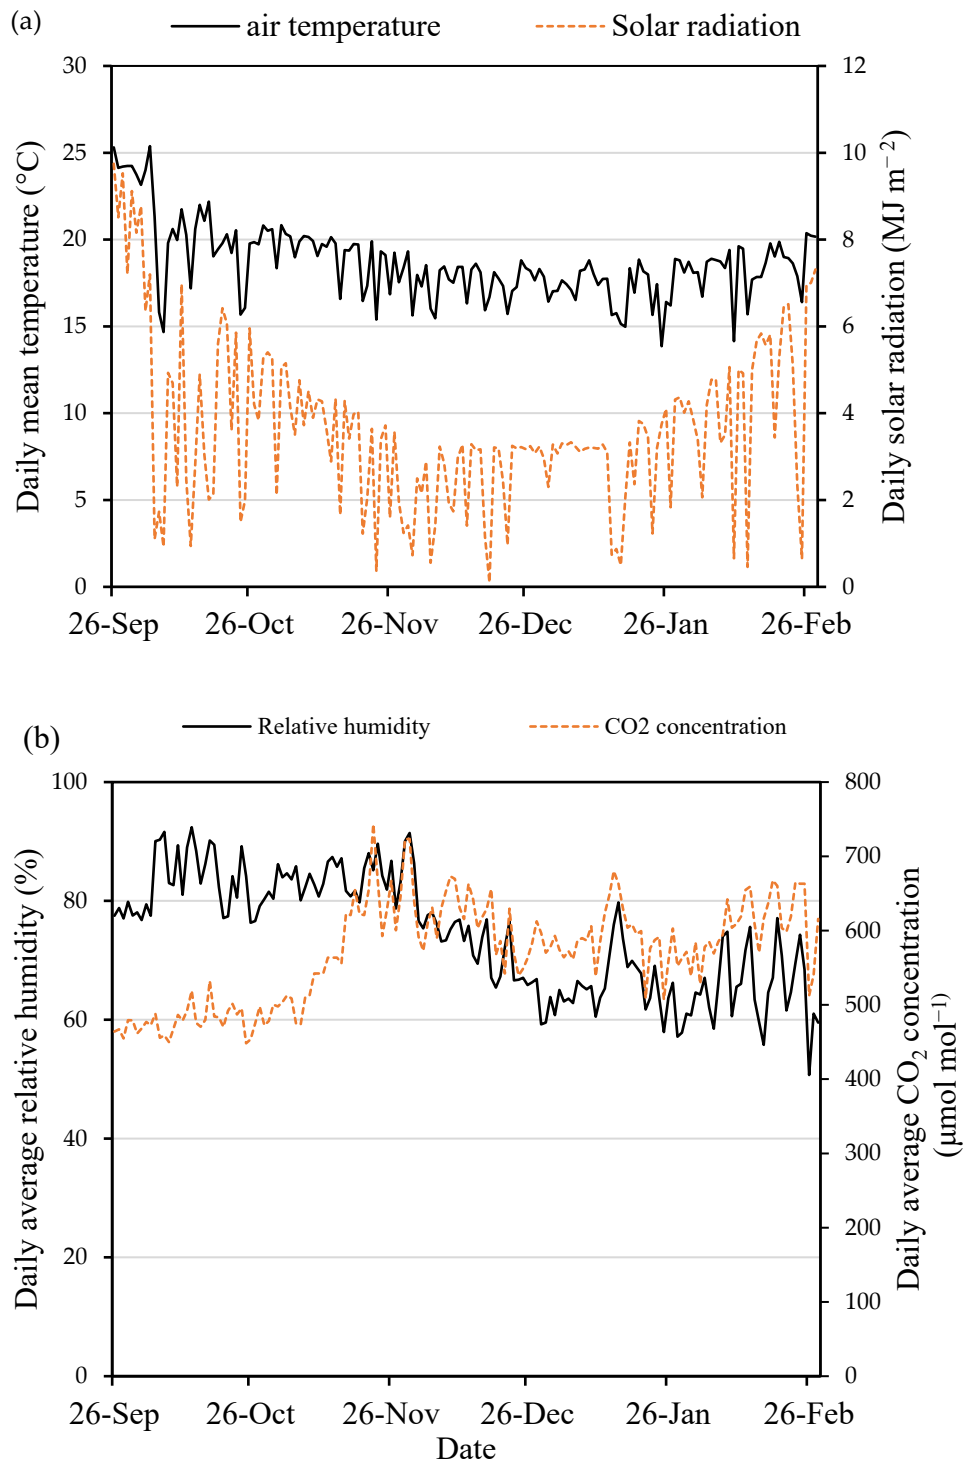

**Figure S2:** Daily mean temperature and cumulative irradiation (a), and daily average relative humidity and carbon dioxide (CO<sub>2</sub>) concentration (b) in the greenhouse.

**Table S1:** Total nutrients supplied and absorbed during the cultivation period.

|                                     | Treatment | Nutrient (g plant <sup>-1</sup> ) |                               |                |                  |                  |                               |
|-------------------------------------|-----------|-----------------------------------|-------------------------------|----------------|------------------|------------------|-------------------------------|
|                                     |           | N                                 | PO <sub>4</sub> <sup>3-</sup> | K <sup>+</sup> | Ca <sup>2+</sup> | Mg <sup>2+</sup> | SO <sub>4</sub> <sup>2-</sup> |
| Supplied                            | ECM       | 46.8                              | 4.9                           | 46.6           | 43.5             | 13.8             | 16.1                          |
|                                     | QNM       | 35.9                              | 4.5                           | 40.1           | 31.1             | 10.7             | 12.0                          |
| Reduction (%)                       |           | 23.3                              | 8.2                           | 14.0           | 28.5             | 22.5             | 25.5                          |
| Absorbed                            | ECM       | 29.2                              | 4.6                           | 32.7           | 21.3             | 5.0              | 4.5                           |
|                                     | QNM       | 29.8                              | 4.1                           | 28.8           | 22.1             | 6.8              | 3.7                           |
| <sup>z</sup> Reduction/increase (%) |           | -2.1                              | 10.9                          | 11.9           | -3.8             | -36.0            | 17.8                          |

<sup>z</sup>Negative values represent increased nutrient elements' uptake in the QNM treatment.
